# Supplementary material for: Highly biocompatible TiO2:Gd3+ nano-contrast agent with enhanced longitudinal relaxivity for targeted cancer imaging
Source: Royal Society of Chemistry journal article supplement (doi:10.1039/c1nr10591d), 2011-01-01
Supplement: c1nr10591d.pdf [file c1nr10591d.pdf]

### Electronic supplementary information

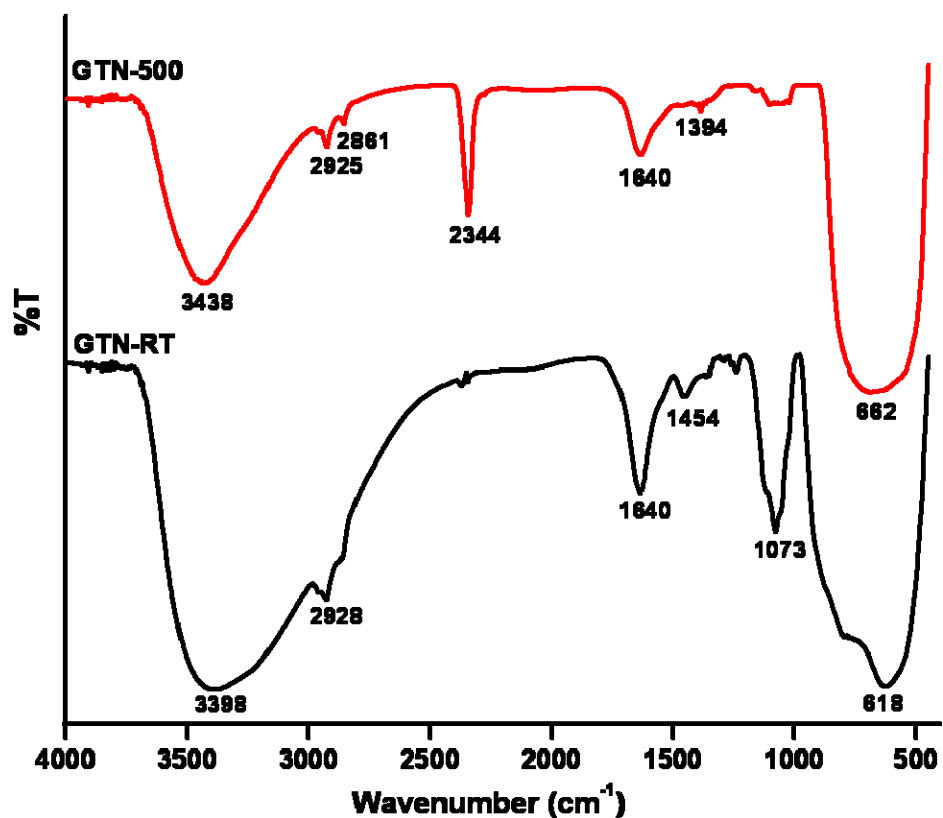

SI Fig. 1. FTIR spectra of GTN-RT and GTN-500 recorded in KBr supported pellets. GTN-RT: Unannealed Gd<sup>3+</sup> doped amorphous TiO<sub>2</sub>, GTN-500: GTN sample air annealed at 500°C.
